# Supplementary material
Source: publisher figshare collection journal article supplement (https://sage.figshare.com/ndownloader/files/18514163)
Supplement: Supplementary file 1 [file 18514163]

| **Guideline for interviews with parents.** |
| --- |
| **Questions regarding the child** |
| - Please try to briefly describe the palliative care your child receives. - How is your child doing now?   - How does the palliative care figure into the improvement/deterioration of your child? - Can the palliative care support your child somehow?   - How exactly?   - How do you notice it is effective?   - Have any changes occurred for your child as a consequence of the palliative care? If yes, what changed? - What does everyday life look like for your child these days?   - Have any changes occurred in your child’s daily routine since palliative care started?   - In how far has the palliative care affected these changes? - Is there any aspect that prevails for you regarding the palliative care of your child? If yes, have any changes occurred regarding this aspect that are due to the palliative care? - What effect did the care have on your child? Please try to describe the most important changes regarding your child that have occurred as a consequence of receiving palliative care. |
| Questions regarding the parents |
| - How do you experience receiving palliative care for your child and your family?   - Do you feel like you benefit personally from receiving care? Can you explain how?   - How are you being supported by palliative care services?   - Have any important changes occurred for you personally as a consequence of the palliative care? - Which offers provided through the palliative care are you making use of?   - How would you rate these offers?   - Do you miss any specific offers? - You have already told me about your child’s daily routine. What does your own daily routing look like?   - Have any changes in your daily routine resulted from receiving palliative care?   - What meaning do these changes bear to you? - What does your social life look like recently?   - Have any changes in your social life occurred as a result of receiving palliative care? - What meaning does the care you receive have for you? |
| **Questions regarding other family members (e.g. siblings, grandparents)** |
| - Describe how the palliative care team interacts with your child’s siblings   - Do the siblings take part in any activities/offers provided by the palliative care team?   - How would you rate the activities/offers for siblings? - How do the siblings cope with the palliative care?   - Have any changes for the siblings occurred as a result of the palliative care? - What about other involved family members (e.g. grandparents)?   - In how far does the palliative care include/address them?   - How would you describe the palliative care team’s interaction with the other family members?   - Have any changes occurred for the other family members as a consequence of the palliative care? |
| Questions regarding the involved staff |
| - What is your impression of the palliative care team’s physicians/therapists/nurses etc.?   - What does the collaboration with the palliative care team look like?   - What goes well?   - Is there anything that you desired from the palliative care team that has not happened/has not been done?   - Have there been situations in which you were unsatisfied with the palliative care team? Please describe those situations. |
| **Summary** |
| - In summary, what are the positive aspects of being cared for by a palliative care team? - What are negative aspects that result from being cared for by a palliative care team? What are potential shortcomings of the care? - Lastly, do you have any suggestions for improvement for the palliative care teams? |
| *Note.* First-order bullet points represent the main questions. Second-order bullet points represent optional follow-up questions. |
